# Supplementary material
Source: PubMed Central journal article supplement (PMC7443895)
Supplement: pnas.2001772117.sapp.pdf [file pnas.2001772117.sapp.pdf]

Supplement:

Below are the 21 stimuli used for all three experiments. Each row represents a painting, its title, artist, and which set of three paintings it belonged to. The distance column presents the overall proportion of instances (across subjects) that each painting was placed in one year. Liking and Abstraction columns represent average ratings collected from 40 independent subjects on Mechanical Turk.

| Image                                                                               | Painting               | Set | Distance<br>(p of "in a year") | Liking Rating<br>(1-7) | Abstraction Rating<br>(1-7) | Artist         |
|-------------------------------------------------------------------------------------|------------------------|-----|--------------------------------|------------------------|-----------------------------|----------------|
|    | <i>PH-672</i>          | 6   | M=.34<br>SE=.07                | M=4.54<br>SD=1.48      | M=1.36,<br>SD=.78           | Clyfford Still |
|    | <i>Untitled (1937)</i> | 6   | M=.29<br>SE=.06                | M=4.05<br>SD=1.62      | M=4.94,<br>SD=1.07          | Clyfford Still |
|   | <i>1945-R</i>          | 6   | M=.48<br>SE=.07                | M=3.33<br>SD=1.65      | M=6.34<br>SD=1.06           | Clyfford Still |
|  | <i>PP-241</i>          | 7   | M=.27<br>SE=.06                | M=4.0<br>SD=1.44       | M=1.69<br>SD=1.01           | Clyfford Still |
|  | <i>PH-726</i>          | 7   | M=.55<br>SE=.07                | M=3.68<br>SD=1.64      | M=4.53<br>SD=1.29           | Clyfford Still |
|  | <i>PH-212</i>          | 7   | M=.46<br>SE=.07                | M=3.08<br>SD=1.57      | M=6.48<br>SD=1.31           | Clyfford Still |

|                                                                                     |                                   |   |                 |                   |                   |               |
|-------------------------------------------------------------------------------------|-----------------------------------|---|-----------------|-------------------|-------------------|---------------|
|  | <i>Farm Near Duivendrecht</i>     | 2 | M=.24<br>SE=.06 | M=5.42<br>SD=1.46 | M=2.18<br>SD=1.04 | Piet Mondrian |
|  | <i>Still Life with Ginger Pot</i> | 2 | M=.48<br>SE=.07 | M=4.19<br>SD=1.42 | M=4.46<br>SD=1.23 | Piet Mondrian |

|                                                                                     |                                          |   |                 |                   |                   |               |
|-------------------------------------------------------------------------------------|------------------------------------------|---|-----------------|-------------------|-------------------|---------------|
|    | <i>Composition in Blue Gray and Pink</i> | 2 | M=.50<br>SE=.07 | M=4.53<br>SD=1.77 | M=5.58<br>SD=1.37 | Piet Mondrian |
|    | <i>Self Portrait</i>                     | 3 | M=.5<br>SE=.07  | M=4.03<br>SD=1.62 | M=1.42<br>SD=.78  | Piet Mondrian |
|    | <i>Nude</i>                              | 3 | M=.32<br>SE=.07 | M=3.83<br>SD=1.71 | M=5.24<br>SD=.92  | Piet Mondrian |
|    | <i>Composition in Gray and Blue</i>      | 3 | M=.45<br>SE=.07 | M=4.08<br>SD=1.67 | M=5.72<br>SD=1.47 | Piet Mondrian |
|    | <i>Mark</i>                              | 1 | M=.42<br>SE=.07 | M=4.11<br>SD=2.13 | M=1.2<br>SD=.64   | Chuck Close   |
|   | <i>Nude Woman Reclining</i>              | 1 | M=.44<br>SE=.07 | M=3.32<br>SD=1.56 | M=6.26<br>SD=.99  | Chuck Close   |
|  | <i>Man Walking</i>                       | 1 | M=.46<br>SE=.07 | M=3.34<br>SD=1.74 | M=6.44<br>SD=1.16 | Chuck Close   |

|                                                                                     |                                                        |   |                 |                   |                   |             |
|-------------------------------------------------------------------------------------|--------------------------------------------------------|---|-----------------|-------------------|-------------------|-------------|
|  | <i>Untitled (still life with vase and two statues)</i> | 4 | M=.32<br>SE=.07 | M=3.73<br>SD=1.52 | M=1.62<br>SD=.85  | Mark Rothko |
|  | <i>Slow Swirl at the edge of the sea</i>               | 4 | M=.44<br>SE=.07 | M=4.51<br>SD=1.57 | M=5.34<br>SD=1.10 | Mark Rothko |
|  | <i>Untitled</i>                                        | 4 | M=.52<br>SE=.07 | M=3.08<br>SD=1.64 | M=6.28<br>SD=1.05 | Mark Rothko |
|  | <i>Entombment II</i>                                   | 5 | M=.36<br>SE=.07 | M=4.13<br>SD=1.44 | M=3.02<br>SD=1.29 | Mark Rothko |

|                                                                                   |                           |   |                 |                   |                   |             |
|-----------------------------------------------------------------------------------|---------------------------|---|-----------------|-------------------|-------------------|-------------|
| 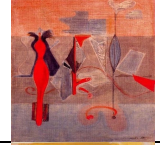 | <i>Primeval Landscape</i> | 5 | M=.46<br>SE=.07 | M=4.22<br>SD=1.75 | M=4.94<br>SD=1.22 | Mark Rothko |
|  | <i>Multiform</i>          | 5 | M=.57<br>SE=.07 | M=3.54<br>SD=1.82 | M=6.53<br>SD=1.03 | Mark Rothko |
